# Supplementary material for: Pyoverdine-Mediated Killing of Caenorhabditis elegans by Pseudomonas syringae MB03 and the Role of Iron in Its Pathogenicity
Source: MDPI journal article supplement (doi:10.3390/ijms21062198), 2020-03-22
Supplement: s1 [file s1]

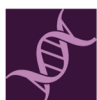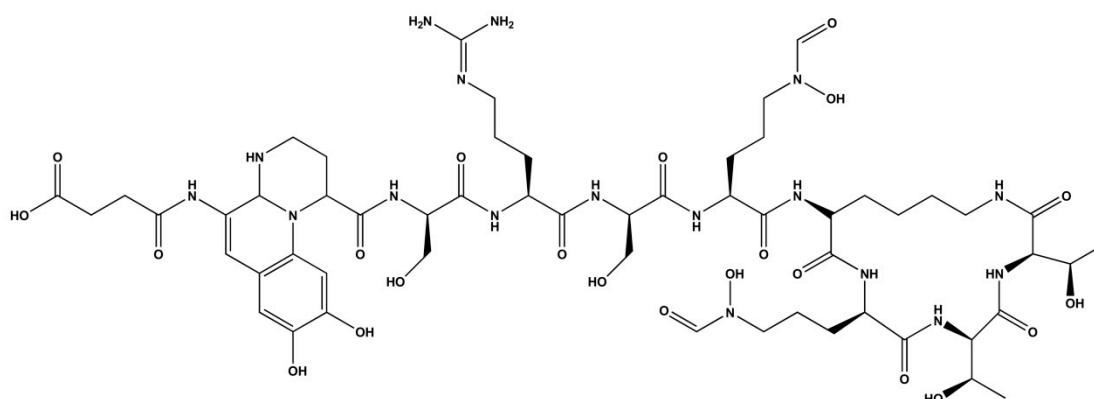

**Figure S1.** Chemical structure of pyoverdine produced by *P. syringae* MB03.

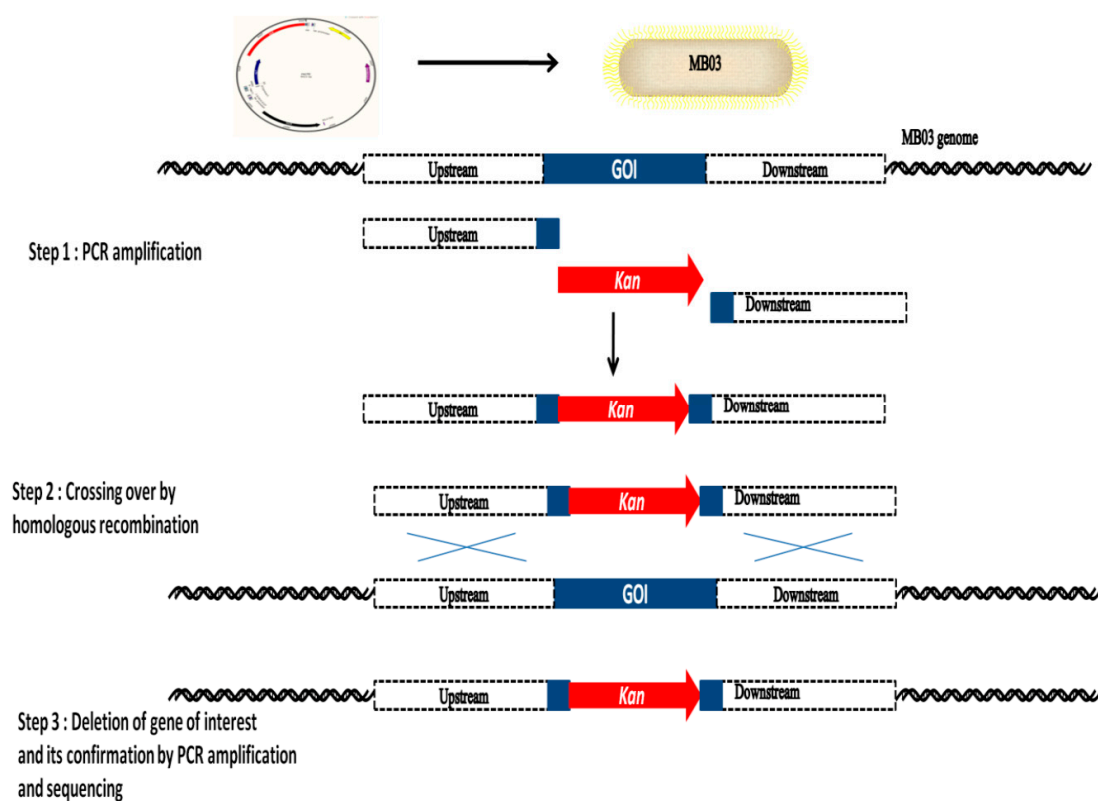

**Figure S2.** Schematic representation of gene disruption via Rec/TE recombination system.

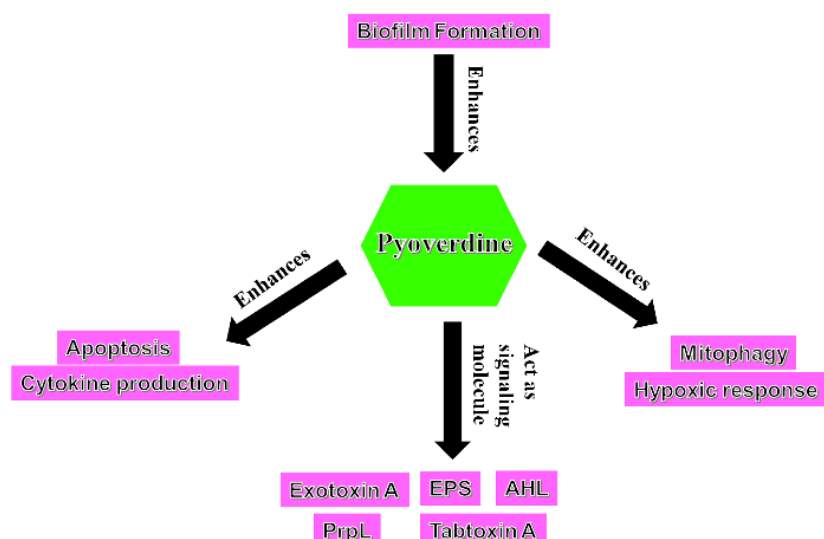

**Figure S3.** Role of pyoverdine in the pathogenicity. Pyoverdine enhances the innate immunity by induces mitophagy, hypoxic response, apoptosis and cytokine production. Pyoverdine also serves as signaling molecule by stimulating the production of other virulence factors in *P. aeruginosa* such as Exotoxin A and PrpL. Biofilm formation enhances the production of pyoverdine.

**Table S1.** Summary of *P. aeruginosa* PAO1 and *P. syringae* MB03 pyoverdine genes.

| PAO1 Genes       | Annotated Function in <i>P. aeruginosa</i> PAO1                       | Orthologs in <i>P. syringae</i> MB03 |
|------------------|-----------------------------------------------------------------------|--------------------------------------|
| <i>pvdX</i>      | Regulatory protein                                                    | <b>Absent</b>                        |
| <i>pvdY</i>      | Regulatory protein                                                    | <b>Absent</b>                        |
| <i>fpvR</i>      | Anti-sigma factor for <i>pvdS</i>                                     | VT47-09085                           |
| <i>pvdS</i>      | ECF iron sigma 70 factor                                              | VT47_09155                           |
| <i>pvdG</i>      | Thioesterase                                                          | VT47_09160                           |
| <i>pvdL</i>      | Chromophore peptide synthetase                                        | VT47_09165                           |
| <i>pvdH</i>      | Aminotransferase                                                      | VT47_09170                           |
| Pa_2412          | MbtH-like protein                                                     | VT47_09175                           |
| Pa_2403-2406     | ABC transporters                                                      | VT47_09180-09195                     |
| Pa_2407-2410     | Hypothetical proteins                                                 | VT47_09200-09215                     |
| <b>Absent</b>    | Aspartate hydroxylase                                                 | VT47_09220                           |
| <i>pvdD</i>      | Pyoverdine peptide chain-NRPS                                         | VT47_09225-09240                     |
| <i>pvdI</i>      | Pyoverdine peptide chain-NRPS                                         | VT47_09230                           |
| <i>pvdJ</i>      | Pyoverdine peptide chain-NRPS                                         | VT47_09235                           |
| <i>pvdK</i>      | Pyoverdine peptide chain-NRPS                                         | VT47_09240                           |
| <i>fpvA</i>      | Ferripyoverdine receptor protein                                      | VT47_09245,09250                     |
| <i>pvdE</i>      | Cyclic peptide ABC transporter                                        | VT47_09255                           |
| <i>pvdONMP</i>   | Periplasmic proteins probably involve in the maturation of pyoverdine | VT47_09260-09275                     |
| <i>pvdRT-Omp</i> | RND/MFP/OMF type-efflux system                                        | VT47_09280-09290                     |
| <i>pvdQ</i>      | Acylase                                                               | VT47_09295                           |
| <i>pvdA</i>      | L-ornithine hydroxylase                                               | <b>Absent</b>                        |
| <i>pvdF</i>      | N5-hydroxyornithine transformylase                                    | <b>Absent</b>                        |
| <i>fpvI</i>      | ECF sigma factor required for the expression of <i>fpvA</i>           | <b>Absent</b>                        |
